# Supplementary material for: Multiplexed elemental bioimaging with quadrupole ICP-MS and high-frequency laser ablation systems
Source: Royal Society of Chemistry journal article supplement (doi:10.1039/d3ja00447c), 2024-01-01
Supplement: d3ja00447c1.pdf [file d3ja00447c1.pdf]

## Multiplexed elemental bioimaging with quadrupole ICP-MS and high-frequency laser ablation systems

### Supplementary Information

Thomas E. Lockwood, Mika Westerhausen and David P. Bishop

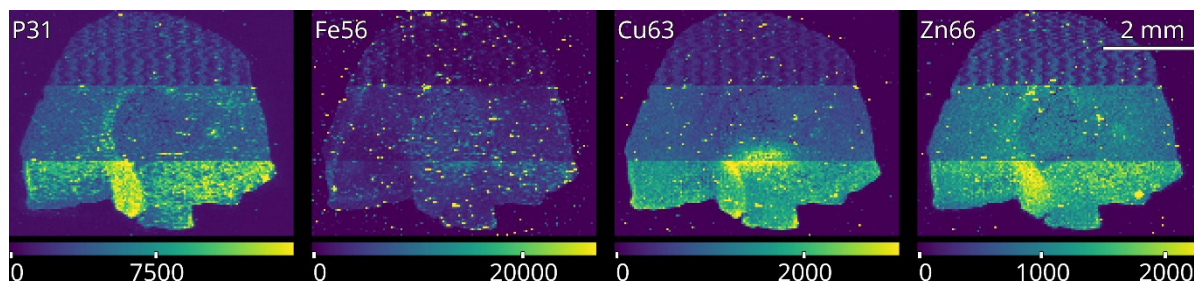

Figure S1. Elements in a murine brain hemisphere imaged at three firing rates, 47, 94 and 188 Hz.

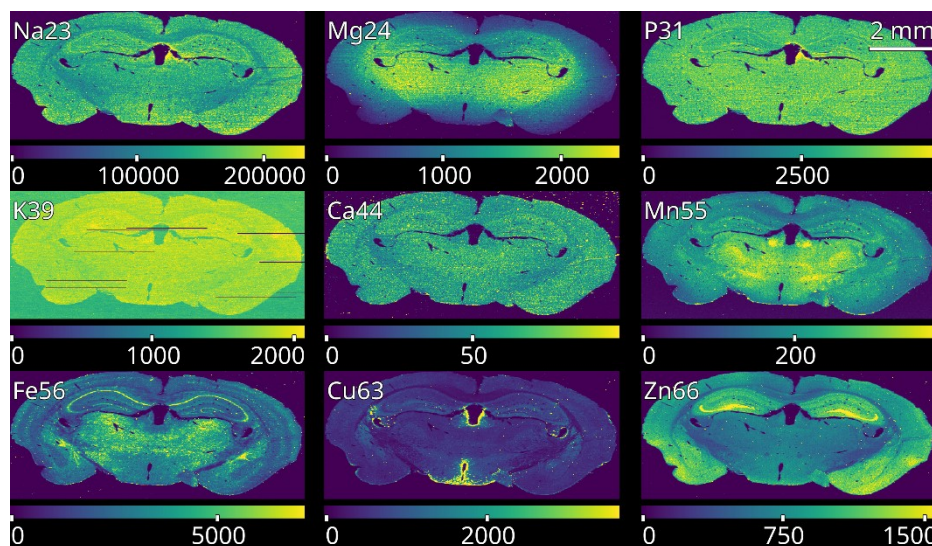

Figure S2. Response for nine elements in a murine brain, collected using oversampling (200 Hz). Dwell times ranged from 1 to 6 ms and the total acquisition time was 40 ms.
